# Supplementary material
Source: Springer Nature journal article supplement (https://www.springermedizin.de/resource/supplementary/13014_2009_199_MOESM3_ESM.pdf/9633124)

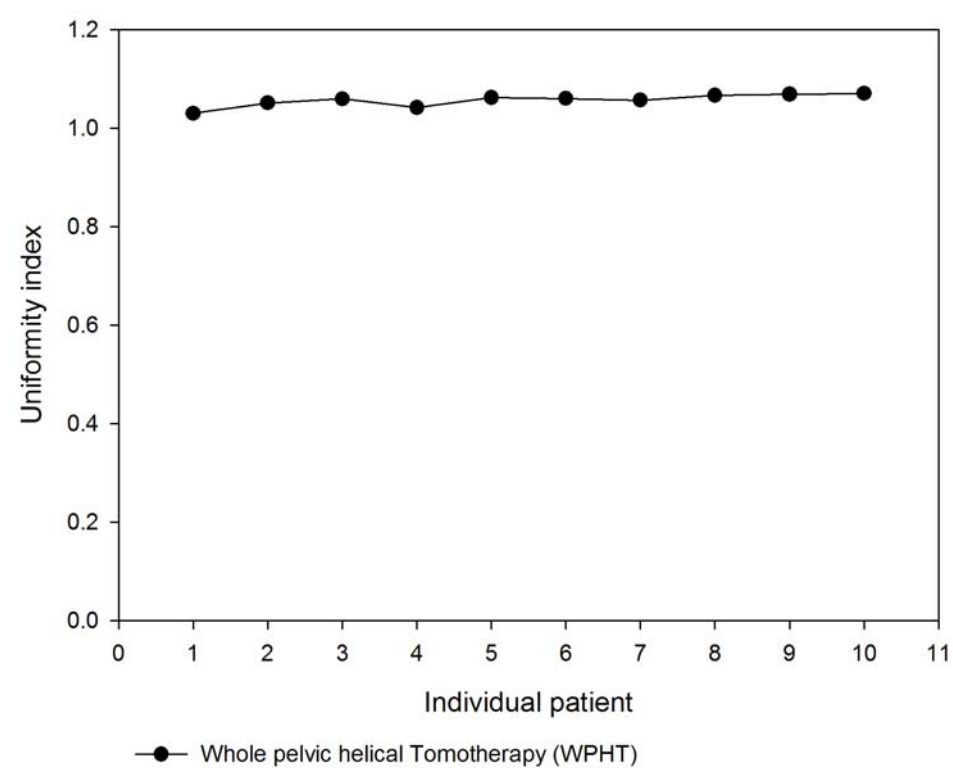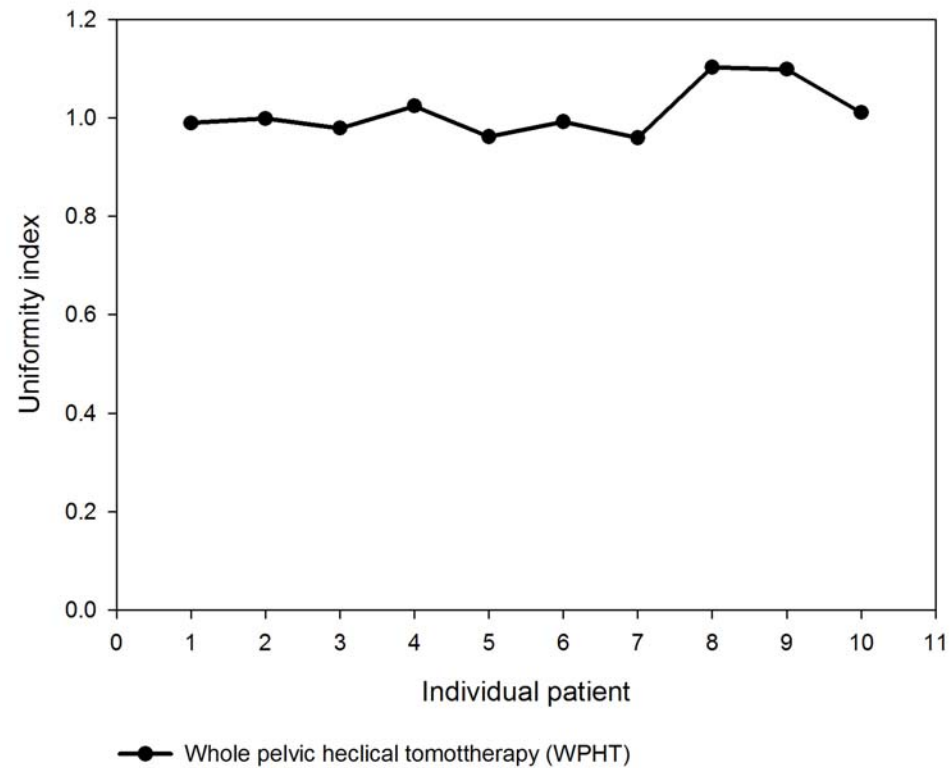

Supplement: MOESM3 [file 9633124]
